# Supplementary material for: Novel drug-repository contact lens for prolonging the antimicrobial-cornea interaction for bacterial keratitis treatment: randomised controlled trial results
Source: HighWire-hosted journal article supplement (doi:10.1136/bmjophth-2022-001093), 2022-10-01
Supplement: bmjophth-2022-001093supp003_data_supplement.pdf [file bmjophth-2022-001093supp003_data_supplement.pdf]

Supplementary Table 1. Bacterial keratitis severity, anterior chamber reaction and corneal haze scoring criteria

| <b>BK Severity*</b> | <b>Grade</b> | <b>AC Reaction</b> | <b>Grade</b> | <b>Corneal Haze</b>                                   | <b>Grade</b> |
|---------------------|--------------|--------------------|--------------|-------------------------------------------------------|--------------|
| None                | 0            | None               | 0            | No corneal haze                                       | 0            |
| 0 < X < 1 mm        | 1            | <20 cells          | 1            | Iris details visible                                  | 1            |
| 1 ≤ X < 2 mm        | 2            | >20 cells          | 2            | Pupillary margin visible;<br>iris details not visible | 2            |
| 2 ≤ X < 4 mm        | 3            | Hypopyon           | 3            | Pupillary margin not visible                          | 3            |
| 4 ≤ X ≤ 8 mm        | 4            | -                  | -            | Entirely opaque cornea                                | 4            |
| X > 8 mm            | 5            |                    |              |                                                       |              |

Abbreviations: AC, Anterior chamber; BK, Bacterial keratitis. \*Based on the average infiltration and epithelial defect size
