# Supplementary material for: Novel drug-repository contact lens for prolonging the antimicrobial-cornea interaction for bacterial keratitis treatment: randomised controlled trial results
Source: HighWire-hosted journal article supplement (doi:10.1136/bmjophth-2022-001093), 2022-10-01
Supplement: bmjophth-2022-001093supp004_data_supplement.pdf [file bmjophth-2022-001093supp004_data_supplement.pdf]

Supplementary Table 2: Visual acuity changes over time

| Visual Acuity |          | Group 1 |      |         | Group 2 |      |         |
|---------------|----------|---------|------|---------|---------|------|---------|
|               |          | Mean    | SD   | P-value | Mean    | SD   | P-value |
| Pair 1        | Baseline | 0.48    | 0.36 | n/a     | 0.48    | 0.33 | 0.021   |
|               | 12H      | 0.48    | 0.36 |         | 0.39    | 0.27 |         |
| Pair 2        | Baseline | 0.48    | 0.36 | 0.08    | 0.48    | 0.33 | <0.0001 |
|               | D1       | 0.45    | 0.35 |         | 0.27    | 0.24 |         |
| Pair 3        | Baseline | 0.48    | 0.36 | 0.016   | 0.48    | 0.33 | <0.0001 |
|               | D3       | 0.36    | 0.33 |         | 0.15    | 0.19 |         |
| Pair 4        | Baseline | 0.48    | 0.36 | 0.001   | 0.48    | 0.33 | <0.0001 |
|               | D5       | 0.31    | 0.33 |         | 0.12    | 0.16 |         |
| Pair 5        | Baseline | 0.48    | 0.36 | <0.0001 | 0.48    | 0.33 | <0.0001 |
|               | D14      | 0.20    | 0.34 |         | 0.09    | 0.14 |         |

Abbreviations: D, Day; H, Hour; SD Standard deviation. Group 1 (antibiotic only, n = 18) and

Group 2 (antibiotic + drug-depository contact lens, n = 17).
