# Supplementary material for: Novel drug-repository contact lens for prolonging the antimicrobial-cornea interaction for bacterial keratitis treatment: randomised controlled trial results
Source: HighWire-hosted journal article supplement (doi:10.1136/bmjophth-2022-001093), 2022-10-01
Supplement: bmjophth-2022-001093supp005_data_supplement.pdf [file bmjophth-2022-001093supp005_data_supplement.pdf]

Supplementary Table 3: Pain scores

| <b>Visit</b> | <b>Group*</b> | <b>Mean</b> | <b>SD</b> | <b>P-value</b> |
|--------------|---------------|-------------|-----------|----------------|
| Baseline     | 1             | 7.89        | 1.08      | 0.52           |
|              | 2             | 7.65        | 1.11      |                |
| 12 H         | 1             | 6.78        | 1.06      | 0.023          |
|              | 2             | 5.65        | 1.69      |                |
| D1           | 1             | 6.00        | 1.34      | <0.0001        |
|              | 2             | 2.88        | 1.11      |                |
| D3           | 1             | 4.00        | 1.53      | <0.0001        |
|              | 2             | 1.53        | 1.37      |                |
| D5           | 1             | 1.89        | 1.57      | <0.0001        |
|              | 2             | 0.23        | 0.44      |                |
| D14          | 1             | 0.39        | 0.78      | 0.04           |
|              | 2             | 0.00        | 0.00      |                |

Abbreviations: D, Day; H, Hour; SD, Standard deviation. \*Group 1 (antibiotic only, n = 18)

and Group 2 (antibiotic + drug-depository contact lens, n = 17).
