# Supplementary figures and images for: Novel drug-repository contact lens for prolonging the antimicrobial-cornea interaction for bacterial keratitis treatment: randomised controlled trial results
Source: HighWire-hosted journal article supplement (doi:10.1136/bmjophth-2022-001093), 2022-10-01

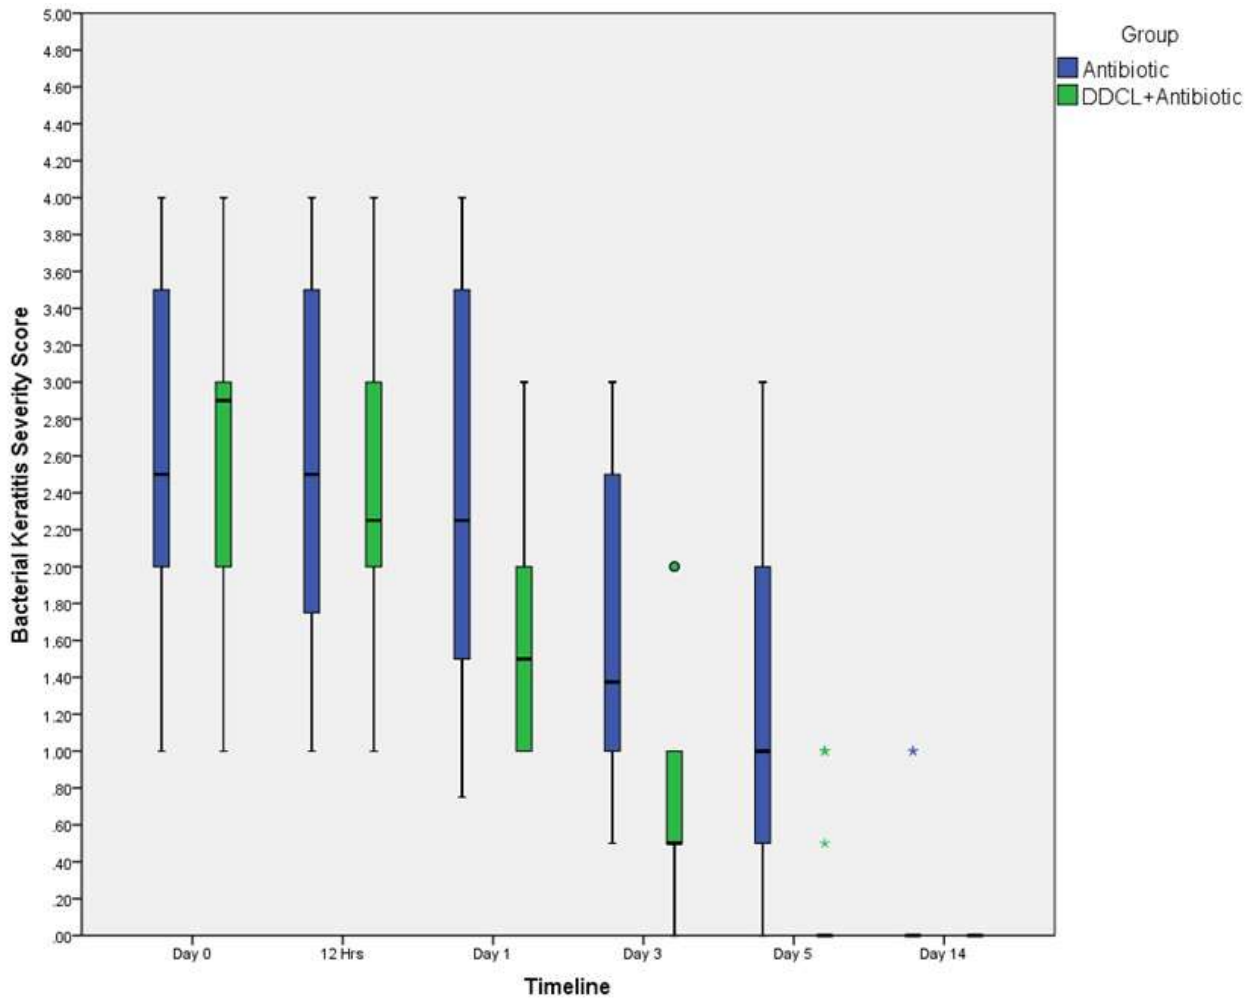

Supplement: bmjophth-2022-001093supp001_data_supplement.pdf [file bmjophth-2022-001093supp001_data_supplement.pdf]
